# Supplementary material for: Outlier detection and gap filling methodologies for low-cost air quality measurements
Source: Royal Society of Chemistry journal article supplement (doi:10.1039/c8em00593a), 2019-01-01
Supplement: c8em00593a1.pdf [file c8em00593a1.pdf]

**Supplementary Information (SI)**

**for**

**Outlier detection and gap filling methodologies for low-cost air quality  
measurements**

**Thor-Bjorn Ottosen, Prashant Kumar<sup>1</sup>**

*Global Centre for Clean Air Research (GCARE), Department of Civil and Environmental  
Engineering, Faculty of Engineering and Physical Sciences, University of Surrey, Guildford  
GU2 7XH, United Kingdom*

---

<sup>1</sup> Corresponding author. Address as above. Tel.: +44 1483 682762; Fax: +44 1483 682135; E-mail addresses: P.Kumar@surrey.ac.uk, Prashant.Kumar@cantab.net

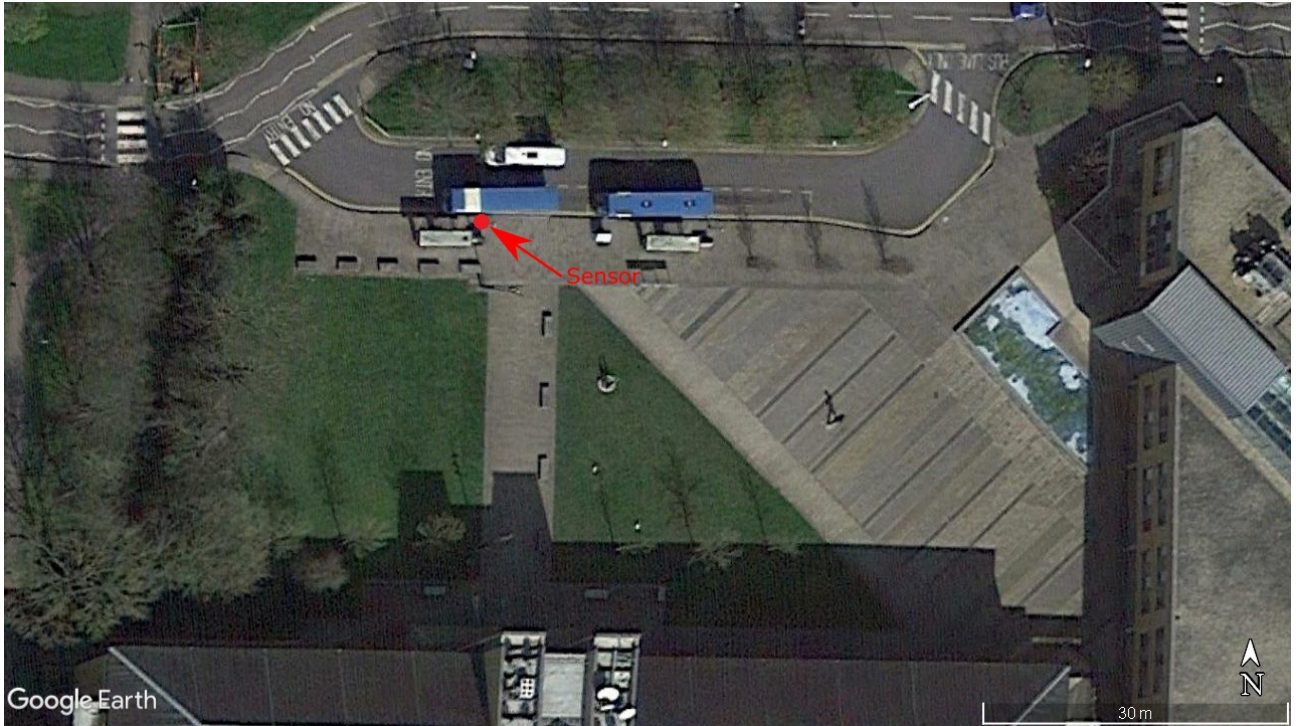

**Figure S1.** Aerial photo of the bus stop, where the measurements have been made. The location of the AQMesh pod is marked with a red dot. Data source: Google Earth.

### **S1. Pruned Exact Linear Time algorithm**

Given an ordered sequence of data (in this case air quality measurements)  $y_{1:n} = (y_1, \dots, y_n)$ , the aim of the algorithm is to find the number of changepoints  $m$  with positions  $\tau_{1:m} = (\tau_1, \dots, \tau_m)$ . To this end, the following expression is minimised:

$$\sum_{i=1}^{m+1} [C(y_{(\tau_{i-1}+1):\tau_i})] + \beta f(m) \quad (1)$$

Where  $C$  is a cost function for segment  $i$  and  $\beta f(m)$  is a penalty function to prevent overfitting. In the PELT algorithm twice the negative log likelihood is used as cost function<sup>1</sup> and the penalty function is set equal to the number of changepoints. Calculating this expression for all possible combinations would yield  $2^{n-1}$  calculations<sup>2</sup>. The PELT algorithm is a faster way to minimise equation 1, and the interested reader is referred to<sup>1</sup> for details.

### **S2. $k$ -Nearest Neighbor outlier detection**

In k-Nearest Neighbor outlier detection, “The anomaly score of a data instance is defined as its distance to its k<sup>th</sup> nearest neighbor in a given data set”<sup>3</sup>. In the present study the Euclidian distance is used:

$$d(\vec{p}, \vec{q}) = \sqrt{(q_1 - p_1)^2 + (q_2 - p_2)^2 + \dots + (q_n - p_n)^2} \quad (2)$$

Where  $\vec{p}$  and  $\vec{q}$  are two air quality measurements with the species representing the components of the vectors.

### S3. Regression based outlier detection

In the present implementation of regression based outlier detection, an Auto-Regressive Integrated Moving Average (ARIMA) model is fitted to the data. The equation for the ARIMA model is<sup>4</sup>:

$$\phi(B)(1 - B^d)y_t = c + \theta(B)\varepsilon_t \quad (3)$$

Where  $y_t$  is the time series of air quality measurements,  $B$  is the backshift operator,  $\phi(z)$  and  $\theta(z)$  are polynomials of order  $p$  and  $q$  respectively. The outlier score is subsequently defined as the residual between the fitted model and the measurements.

### S4. Multivariate Linear regression

Given an air quality measurement with multiple species  $\vec{p} = (p_1, \dots, p_n)$ , where  $p_1$  is missing, the multivariate linear regression fits a function for  $p_1$  as a function of the remaining species:

|  |                                                                        |     |
|--|------------------------------------------------------------------------|-----|
|  | $p_1 = \alpha_1 p_2 + \alpha_2 p_3 + \dots + \alpha_{n-1} p_n + \beta$ | (4) |
|--|------------------------------------------------------------------------|-----|

Where  $\alpha$  and  $\beta$  are regression coefficients.

**Table S1.** Summary statistics for the multivariate gap filling methods.  $\Delta$  is the difference between the parameter for the distribution without gaps and the parameter for the filled distribution. The following statistics are presented: ( $\mu$ ) mean, ( $\sigma$ ) standard deviation, ( $\gamma$ ) skewness, ( $\kappa$ ) kurtosis, (R) correlation, (d) index of agreement, (RMSE) Root Mean Square Error, (MAE) Mean Average Error.

|                       | $\Delta\mu$ | $\Delta\sigma$ | $\Delta\gamma$ | $\Delta\kappa$ | R    | d    | RMSE  | MAE   |
|-----------------------|-------------|----------------|----------------|----------------|------|------|-------|-------|
| <b>NO</b>             |             |                |                |                |      |      |       |       |
| No gap filling        | 1.35        | 1.48           | 0.08           | 0.63           |      |      |       |       |
| Linear interpolation  | 0.36        | 0.15           | 0.02           | 0.17           | 0.79 | 0.88 | 14.25 | 8.35  |
| Linear regression     | 0.82        | 0.54           | 0.03           | 0.46           | 0.76 | 0.83 | 16.02 | 12.44 |
| Neural Networks       | 1.57        | 0.73           | 0.15           | 0.96           | 0.72 | 0.80 | 22.13 | 15.80 |
| <b>NO<sub>2</sub></b> |             |                |                |                |      |      |       |       |
| No gap filling        | 0.96        | 0.53           | 0.05           | 0.19           |      |      |       |       |
| Linear interpolation  | 0.23        | 0.10           | 0.01           | 0.05           | 0.82 | 0.90 | 8.32  | 5.91  |
| Linear regression     | 0.73        | 0.77           | 0.05           | 0.49           | 0.11 | 0.39 | 16.53 | 13.34 |
| Neural Networks       | 1.02        | 0.30           | 0.09           | 0.30           | 0.22 | 0.55 | 21.71 | 16.37 |
| <b>SO<sub>2</sub></b> |             |                |                |                |      |      |       |       |
| No gap filling        | 0.12        | 0.10           | 0.04           | 0.48           |      |      |       |       |
| Linear interpolation  | 0.04        | 0.03           | 0.02           | 0.08           | 0.96 | 0.98 | 1.69  | 1.07  |
| Linear regression     | 0.13        | 0.24           | 0.04           | 0.67           | 0.86 | 0.86 | 3.42  | 2.97  |
| Neural Networks       | 0.22        | 0.13           | 0.04           | 0.39           | 0.87 | 0.89 | 2.98  | 1.90  |
| <b>CO</b>             |             |                |                |                |      |      |       |       |
| No gap filling        | 3.26        | 1.86           | 0.08           | 0.92           |      |      |       |       |
| Linear interpolation  | 0.21        | 0.28           | 0.01           | 0.05           | 0.96 | 0.98 | 23.81 | 15.90 |
| Linear regression     | 2.34        | 6.31           | 0.11           | 1.59           | 0.68 | 0.66 | 76.36 | 55.58 |
| Neural Networks       | 2.10        | 2.94           | 0.08           | 0.74           | 0.81 | 0.85 | 53.95 | 38.04 |
| <b>O<sub>3</sub></b>  |             |                |                |                |      |      |       |       |
| No gap filling        | 0.82        | 0.47           | 0.08           | 0.19           |      |      |       |       |
| Linear interpolation  | 0.13        | 0.11           | 0.01           | 0.05           | 0.94 | 0.97 | 7.17  | 5.18  |
| Linear regression     | 0.51        | 0.79           | 0.04           | 0.42           | 0.78 | 0.84 | 15.67 | 12.47 |
| Neural Networks       | 0.61        | 0.35           | 0.05           | 0.17           | 0.86 | 0.91 | 12.79 | 9.40  |

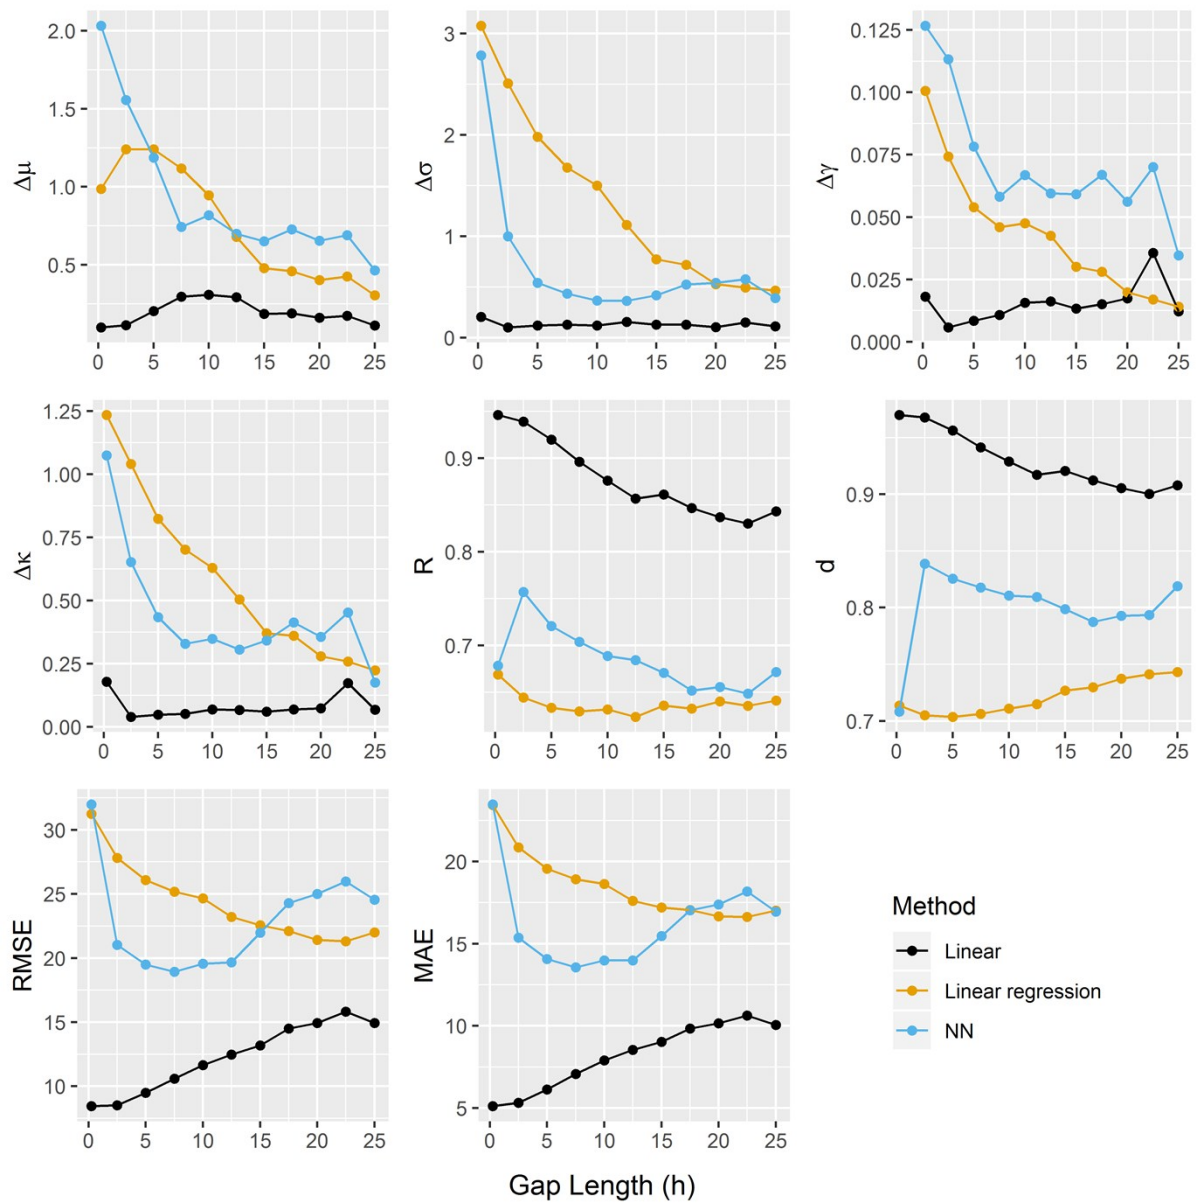

**Figure S2.** Performance statistics for the two multivariate gap filling methods and linear interpolation as a function of gap length in hours.  $\Delta$  is the difference between the parameter for the distribution without gaps and the parameter for the filled distribution. The following statistics are presents: ( $\mu$ ) mean, ( $\sigma$ ) standard deviation, ( $\gamma$ ) skewness, ( $\kappa$ ) kurtosis, (R) correlation, (d) index of agreement, (RMSE) Root Mean Square Error, (MAE) Mean Average Error.

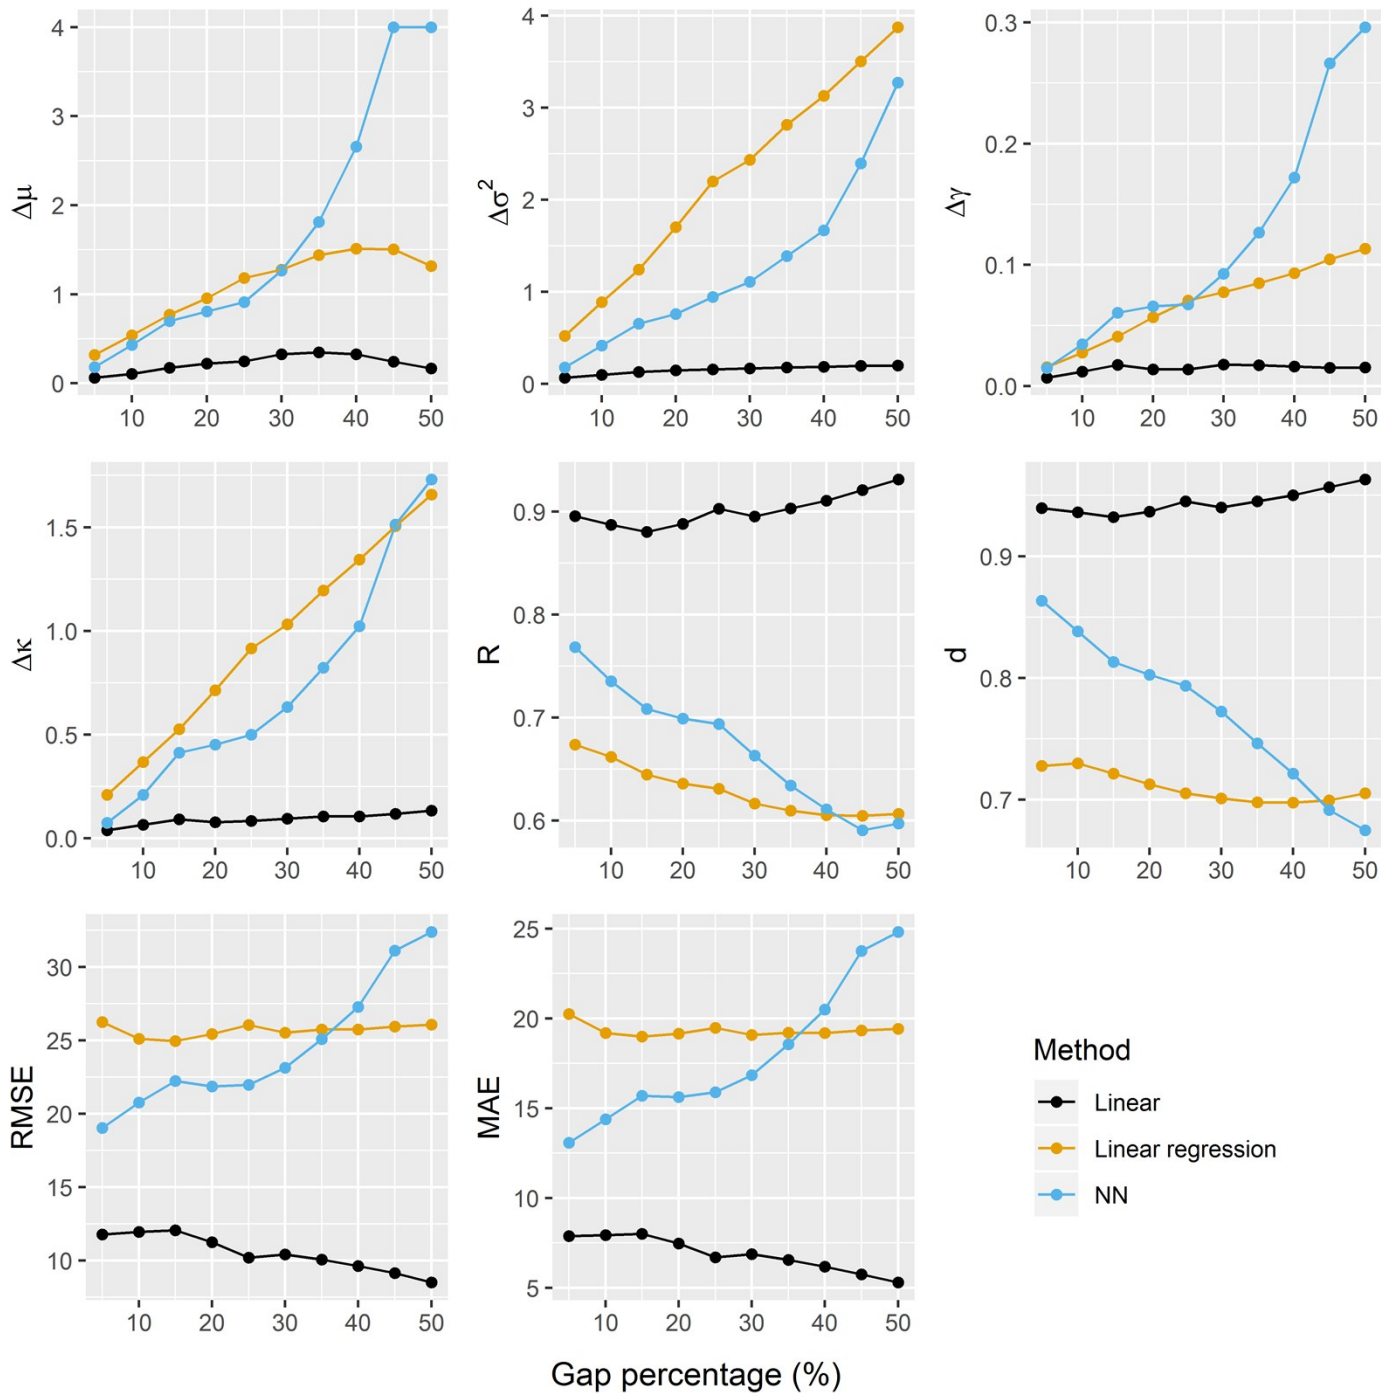

**Figure S3.** Performance statistics for the two multivariate gap filling methods and linear interpolation as a function of gap percentage.  $\Delta$  is the difference between the parameter for the distribution without gaps and the parameter for the filled distribution. The following statistics are presents: ( $\mu$ ) mean, ( $\sigma$ ) standard deviation, ( $\gamma$ ) skewness, ( $\kappa$ ) kurtosis, (R) correlation, (d) index of agreement, (RMSE) Root Mean Square Error, (MAE) Mean Average Error.

## References

1. R. Killick, P. Fearnhead and I. A. Eckley, Optimal Detection of Changepoints With a Linear Computational Cost, *J. Amer. Statistical Assoc.*, 2012, **107**, 1590-1598.
2. R. Killick and I. A. Eckley, changepoint: An R Package for Changepoint Analysis, *Journal of Statistical Software*, 2014, **58**, 19.

3. V. Chandola, A. Banerjee and V. Kumar, Anomaly detection: A survey, *ACM Comput. Surv.*, 2009, **41**, 1-58.
4. R. J. Hyndman and Y. Khandakar, Automatic Time Series Forecasting: The forecast Package for R, *Journal of Statistical Software*, 2008, **27**, 22.
